# Supplementary material for: Numerous recursive sites contribute to accuracy of splicing in long introns in flies
Source: PLoS Genet. 2018 Aug 27;14(8):e1007588. doi: 10.1371/journal.pgen.1007588 (PMC6110457; doi:10.1371/journal.pgen.1007588)
Supplement: S4 Table — (XLSX) [file pgen.1007588.s010.xlsx]

## Sheet: genes with recursive sites
GO.ID	GO.NAME	N.TEST	CAT.N.FG.GENE	CAT.N.BG.GENE	N.FG.GENE	N.BG.GENE	P	ODDS.RATIO
GO:0007517	muscle organ development	653	11	0	272	301	0.000312	inf
GO:0009886	post-embryonic animal morphogenesis	630	41	24	261	301	0.0126	1.97
GO:0008037	cell recognition	499	11	3	220	277	0.0135	4.62
GO:0034660	ncRNA metabolic process	479	8	2	209	274	0.0253	5.24
GO:1901135	carbohydrate derivative metabolic process	463	3	15	201	272	0.0298	0.271
GO:0007268	chemical synaptic transmission	442	9	2	198	257	0.0139	5.84
GO:1903311	regulation of mRNA metabolic process	424	8	3	189	255	0.0634	3.6
GO:1901360	organic cyclic compound metabolic process	407	26	20	181	252	0.0612	1.81
GO:0033043	regulation of organelle organization	347	15	9	155	232	0.0342	2.49
GO:0010557	positive regulation of macromolecule biosynthetic process	317	3	18	140	223	0.0343	0.265
GO:1902532	negative regulation of intracellular signal transduction	290	2	11	137	205	0.0872	0.272
GO:0048519	negative regulation of biological process	273	31	24	135	194	0.0396	1.86
GO:0016310	phosphorylation	169	11	8	104	170	0.0942	2.25
GO:0007610	behavior	142	10	8	93	162	0.132	2.18
GO:0030001	metal ion transport	123	1	11	83	154	0.0648	0.169
GO:0044281	small molecule metabolic process	117	1	10	82	143	0.102	0.174
GO:0050896	response to stimulus	109	8	27	81	133	0.0911	0.487
GO:0043412	macromolecule modification	72	4	15	73	106	0.136	0.387
GO:0044237	cellular metabolic process	57	15	8	69	91	0.0717	2.47
GO:0022607	cellular component assembly	40	10	7	54	83	0.191	2.2
GO:0032501	multicellular organismal process	27	3	14	44	76	0.173	0.37
GO:0009987	cellular process	19	12	28	41	62	0.337	0.648
GO:0008152	metabolic process	12	3	8	29	34	0.331	0.44
GO:0065007	biological regulation	10	9	6	26	26	0.566	1.5
GO:0055085	transmembrane transport	5	6	4	17	20	0.494	1.76
GO:0008150	biological_process	1	11	16	11	16	1	1

## Sheet: genes with high-confidence RS
GO.ID	GO.NAME	N.TEST	CAT.N.FG.GENE	CAT.N.BG.GENE	N.FG.GENE	N.BG.GENE	P	ODDS.RATIO
GO:0042330	taxis	653	7	6	79	494	0.000948	7.3
GO:0048813	dendrite morphogenesis	629	9	17	72	488	0.00509	3.59
GO:0019827	stem cell population maintenance	571	6	11	63	471	0.0125	4.08
GO:0098609	cell-cell adhesion	521	4	7	57	460	0.0286	4.61
GO:0030431	sleep	496	4	9	53	453	0.044	3.8
GO:0007613	memory	481	4	7	49	444	0.0206	5.18
GO:0006357	regulation of transcription by RNA polymerase II	448	10	44	45	437	0.054	2.21
GO:0009886	post-embryonic animal morphogenesis	376	7	28	35	393	0.0295	2.81
GO:0070727	cellular macromolecule localization	325	3	7	28	365	0.0342	5.59
GO:0045664	regulation of neuron differentiation	313	3	7	25	358	0.0278	6.14
GO:0030036	actin cytoskeleton organization	292	3	11	22	351	0.054	4.35
GO:0043900	regulation of multi-organism process	276	2	8	19	340	0.105	4.47
GO:0033554	cellular response to stress	259	3	26	17	332	0.191	2.25
GO:0051252	regulation of RNA metabolic process	219	2	17	14	306	0.224	2.57
GO:0032879	regulation of localization	185	2	21	12	289	0.261	2.29
GO:0065003	macromolecular complex assembly	159	1	9	10	268	0.327	2.98
GO:0006139	nucleobase-containing compound metabolic process	153	2	28	9	259	0.306	2.06
GO:0003008	system process	131	1	10	7	231	0.307	3.3
GO:0006897	endocytosis	121	1	10	6	221	0.285	3.68
GO:0009888	tissue development	110	1	13	5	211	0.317	3.25
GO:0065007	biological regulation	100	0	87	4	198	0.32	0
GO:0071840	cellular component organization or biogenesis	32	1	15	4	111	0.484	1.85
GO:0044238	primary metabolic process	29	0	37	3	96	0.562	0
GO:0044237	cellular metabolic process	8	1	10	3	59	0.487	1.97
GO:0008150	biological_process	6	2	49	2	49	1	1
